# Supplementary material for: Effects of the pulsed electromagnetic field PST® on human tendon stem cells: a controlled laboratory study
Source: Springer Nature journal article supplement (doi:10.1186/s12906-016-1261-3), 2016-08-18
Supplement: MOESM1 [file 10598116]

# Supplementary Fig.S1

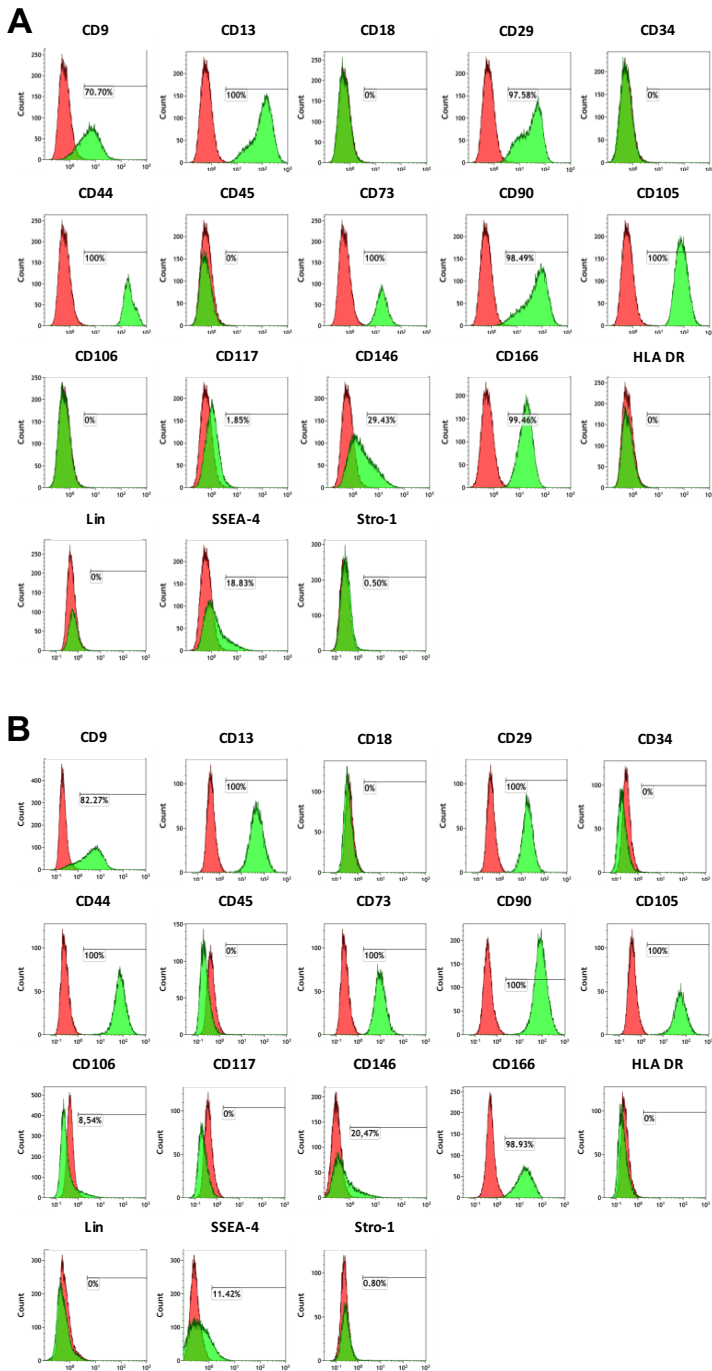

**C**

|         | hDFs        | hTSCs       |
|---------|-------------|-------------|
| CD9     | 77,77±10,00 | 80,41±22,31 |
| CD13    | 99,84±0,23  | 97,9±0,89   |
| CD18    | 0±0         | 0±0         |
| CD29    | 98,29±1,00  | 97,67±0,39  |
| CD34    | 0±0         | 0,19±0,68   |
| CD44    | 100±0       | 99,94±0,27  |
| CD45    | 0±0         | 0±0         |
| CD73    | 99,5±0,71   | 99,08±5,06  |
| CD90    | 99,08±0,83  | 99,81±1,10  |
| CD105   | 100±0       | 100±0       |
| CD106   | 0±0         | 8,99±10,10  |
| CD117   | 0,93±1,30   | 0,29±1,97   |
| CD146   | 19,91±13,46 | 19,04±18,77 |
| CD166   | 96,57±4,09  | 98,37±3,59  |
| HLA-DR  | 0±0         | 0±0         |
| Lineage | 0±0         | 0±0         |
| SSEA-4  | 9,415±13,31 | 10,02±10,53 |
| Stro-1  | 0,25±0,35   | 4,63±8,04   |

**Suppl.Fig.S1.** Phenotypic characterization of human dermal fibroblasts (hDFs) (A) and human tendon stem cells (hTSCs) (B) by flow cytometry; representative expression panels is shown. (C) Average of marker expression levels (%±SD) of three independent experiments are reported in table.
